# Supplementary material for: A cost-effectiveness analysis of capecitabine maintenance therapy versus routine follow-up for early-stage triple-negative breast cancer patients after standard treatment from a perspective of Chinese society
Source: Springer Nature journal article supplement (doi:10.1186/s12916-022-02516-9), 2022-09-26
Supplement: MOESM1 [file 23539474]

## Supplementary materials

Table S1. CHEERS 2022 Checklist

| Topic                                                   | No. | Item                                                                                                                                            | Reported |
|---------------------------------------------------------|-----|-------------------------------------------------------------------------------------------------------------------------------------------------|----------|
| <b>Title</b>                                            |     |                                                                                                                                                 |          |
|                                                         | 1   | Identify the study as an economic evaluation and specify the interventions being compared.                                                      | Yes      |
| <b>Abstract</b>                                         |     |                                                                                                                                                 |          |
|                                                         | 2   | Provide a structured summary that highlights context, key methods, results, and alternative analyses.                                           | Yes      |
| <b>Introduction</b>                                     |     |                                                                                                                                                 |          |
| <b>Background and objectives</b>                        | 3   | Give the context for the study, the study question, and its practical relevance for decision making in policy or practice.                      | Yes      |
| <b>Methods</b>                                          |     |                                                                                                                                                 |          |
| <b>Health economic analysis plan</b>                    | 4   | Indicate whether a health economic analysis plan was developed and where available.                                                             | Yes      |
| <b>Study population</b>                                 | 5   | Describe characteristics of the study population (such as age range, demographics, socioeconomic, or clinical characteristics).                 | Yes      |
| <b>Setting and location</b>                             | 6   | Provide relevant contextual information that may influence findings.                                                                            | Yes      |
| <b>Comparators</b>                                      | 7   | Describe the interventions or strategies being compared and why chosen.                                                                         | Yes      |
| <b>Perspective</b>                                      | 8   | State the perspective(s) adopted by the study and why chosen.                                                                                   | Yes      |
| <b>Time horizon</b>                                     | 9   | State the time horizon for the study and why appropriate.                                                                                       | Yes      |
| <b>Discount rate</b>                                    | 10  | Report the discount rate(s) and reason chosen.                                                                                                  | Yes      |
| <b>Selection of outcomes</b>                            | 11  | Describe what outcomes were used as the measure(s) of benefit(s) and harm(s).                                                                   | Yes      |
| <b>Measurement of outcomes</b>                          | 12  | Describe how outcomes used to capture benefit(s) and harm(s) were measured.                                                                     | Yes      |
| <b>Valuation of outcomes</b>                            | 13  | Describe the population and methods used to measure and value outcomes.                                                                         | Yes      |
| <b>Measurement and valuation of resources and costs</b> | 14  | Describe how costs were valued.                                                                                                                 | Yes      |
| <b>Currency, price date, and conversion</b>             | 15  | Report the dates of the estimated resource quantities and unit costs, plus the currency and year of conversion.                                 | Yes      |
| <b>Rationale and description of model</b>               | 16  | If modelling is used, describe in detail and why used. Report if the model is publicly available and where it can be accessed.                  | Yes      |
| <b>Analytics and assumptions</b>                        | 17  | Describe any methods for analysing or statistically transforming data, any extrapolation methods, and approaches for validating any model used. | Yes      |
| <b>Characterising heterogeneity</b>                     | 18  | Describe any methods used for estimating how the results of the study vary for subgroups.                                                       | NA       |

| Topic                                                                        | No. | Item                                                                                                                                                                          | Reported |
|------------------------------------------------------------------------------|-----|-------------------------------------------------------------------------------------------------------------------------------------------------------------------------------|----------|
| <b>Characterising distributional effects</b>                                 | 19  | Describe how impacts are distributed across different individuals or adjustments made to reflect priority populations.                                                        | No       |
| <b>Characterising uncertainty</b>                                            | 20  | Describe methods to characterise any sources of uncertainty in the analysis.                                                                                                  | Yes      |
| <b>Approach to engagement with patients and others affected by the study</b> | 21  | Describe any approaches to engage patients or service recipients, the general public, communities, or stakeholders (such as clinicians or payers) in the design of the study. | NA       |
| <b>Results</b>                                                               |     |                                                                                                                                                                               |          |
| <b>Study parameters</b>                                                      | 22  | Report all analytic inputs (such as values, ranges, references) including uncertainty or distributional assumptions.                                                          | Yes      |
| <b>Summary of main results</b>                                               | 23  | Report the mean values for the main categories of costs and outcomes of interest and summarise them in the most appropriate overall measure.                                  | Yes      |
| <b>Effect of uncertainty</b>                                                 | 24  | Describe how uncertainty about analytic judgments, inputs, or projections affect findings. Report the effect of choice of discount rate and time horizon, if applicable.      | Yes      |
| <b>Effect of engagement with patients and others affected by the study</b>   | 25  | Report on any difference patient/service recipient, general public, community, or stakeholder involvement made to the approach or findings of the study                       | NA       |
| <b>Discussion</b>                                                            |     |                                                                                                                                                                               |          |
| <b>Study findings, limitations, generalisability, and current knowledge</b>  | 26  | Report key findings, limitations, ethical or equity considerations not captured, and how these could affect patients, policy, or practice.                                    | Yes      |
| <b>Other relevant information</b>                                            |     |                                                                                                                                                                               |          |
| <b>Source of funding</b>                                                     | 27  | Describe how the study was funded and any role of the funder in the identification, design, conduct, and reporting of the analysis                                            | Yes      |
| <b>Conflicts of interest</b>                                                 | 28  | Report authors conflicts of interest according to journal or International Committee of Medical Journal Editors requirements.                                                 | Yes      |

*From:* Husereau D, Drummond M, Augustovski F, et al. Consolidated Health Economic Evaluation Reporting Standards 2022 (CHEERS 2022) Explanation and Elaboration: A Report of the ISPOR CHEERS II Good Practices Task Force. *Value Health* 2022;25. doi:10.1016/j.jval.2021.10.008

Table S2. Parameters used to fit survival curves in the five parametric models

|                              | Exponential | Weibull  | Log-normal |       | Log-logistic |          | Gamma     |          |           |
|------------------------------|-------------|----------|------------|-------|--------------|----------|-----------|----------|-----------|
|                              | $\lambda$   | $\gamma$ | $\lambda$  | $\mu$ | $\sigma$     | $\gamma$ | $\lambda$ | $\gamma$ | $\lambda$ |
| <b>Disease-free survival</b> |             |          |            |       |              |          |           |          |           |
| Capecitabine                 | 0.00315     | 0.701    | 646.964    | 6.400 | 0.908        | 0.750    | 472.924   | 0.689    | 0.00115   |
| Observation                  | 0.00505     | 0.790    | 274.565    | 5.437 | 0.753        | 0.868    | 194.567   | 0.778    | 0.00293   |
| <b>Overall survival</b>      |             |          |            |       |              |          |           |          |           |
| Capecitabine                 | 0.00254     | 0.983    | 405.775    | 6.074 | 0.627        | 1.037    | 335.195   | 1.008    | 0.00259   |
| Observation                  | 0.00342     | 1.086    | 258.655    | 5.555 | 0.505        | 1.165    | 210.047   | 1.133    | 0.00451   |

Table S3. The results of goodness-of-fit to the individual-level data from the SYSUCC-001 trial

|                              | Exponential    | Weibull  | Log-normal      | Log-logistic | Gamma    |
|------------------------------|----------------|----------|-----------------|--------------|----------|
| <b>Disease-free survival</b> |                |          |                 |              |          |
| Capecitabine                 |                |          |                 |              |          |
| AIC                          | 515.714        | 511.689  | <b>505.371</b>  | 510.195      | 512.509  |
| BIC                          | 519.113        | 518.486  | <b>512.167</b>  | 516.992      | 519.306  |
| SSE                          | 0.122          | 0.057    | <b>0.047</b>    | 0.049        | 0.063    |
| -2 log-likelihood statistic  | -256.857       | -253.845 | <b>-250.685</b> | -253.098     | -254.255 |
| Observation                  |                |          |                 |              |          |
| AIC                          | 706.276        | 704.399  | <b>698.656</b>  | 702.309      | 705.133  |
| BIC                          | 709.637        | 711.122  | <b>705.379</b>  | 709.031      | 711.855  |
| SSE                          | 0.096          | 0.043    | <b>0.025</b>    | 0.031        | 0.051    |
| -2 log-likelihood statistic  | -352.138       | -350.200 | <b>-347.328</b> | -349.154     | -350.566 |
| <b>Overall survival</b>      |                |          |                 |              |          |
| Capecitabine                 |                |          |                 |              |          |
| AIC                          | 448.359        | 450.349  | <b>446.195</b>  | 449.53       | 450.358  |
| BIC                          | <b>451.758</b> | 457.146  | 452.991         | 456.326      | 457.154  |
| SSE                          | 0.021          | 0.019    | <b>0.015</b>    | 0.017        | 0.021    |
| -2 log-likelihood statistic  | -223.180       | -223.175 | <b>-221.097</b> | -222.765     | -223.179 |
| Observation                  |                |          |                 |              |          |
| AIC                          | 549.658        | 551.354  | <b>547.725</b>  | 550.201      | 551.154  |
| BIC                          | <b>553.019</b> | 558.076  | 554.447         | 556.923      | 557.877  |
| SSE                          | 0.022          | 0.028    | <b>0.018</b>    | 0.022        | 0.029    |
| -2 log-likelihood statistic  | -273.829       | -273.677 | <b>-271.862</b> | -273.100     | -273.577 |

SYSUCC: Sun Yat-sen University Cancer Center; AIC: Akaike information criterion; BIC: Bayesian information criterion; SSE: Sum of the squared errors.

(A) Disease-free survival

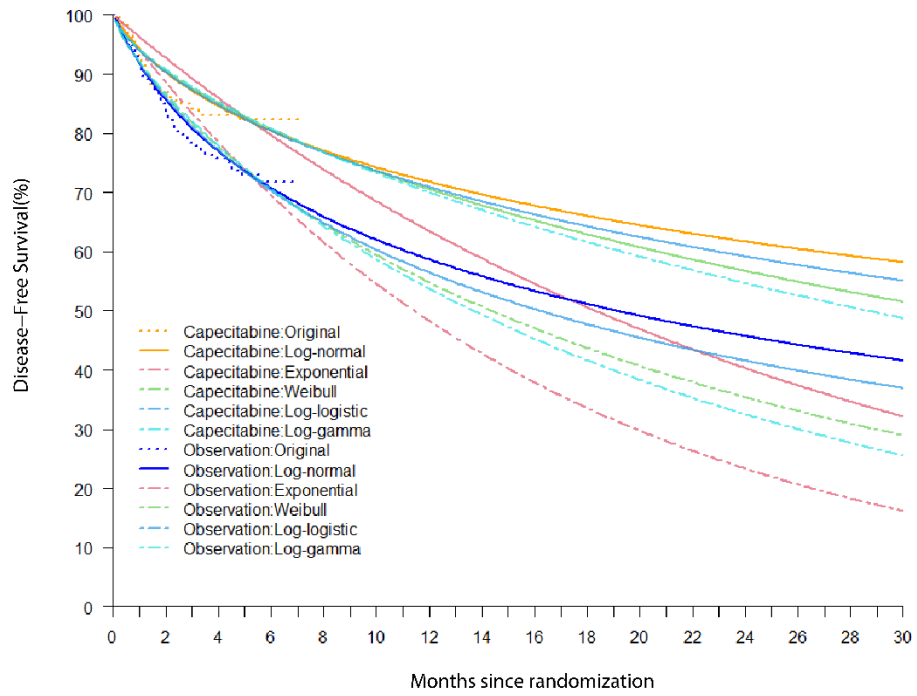

(B) Overall survival

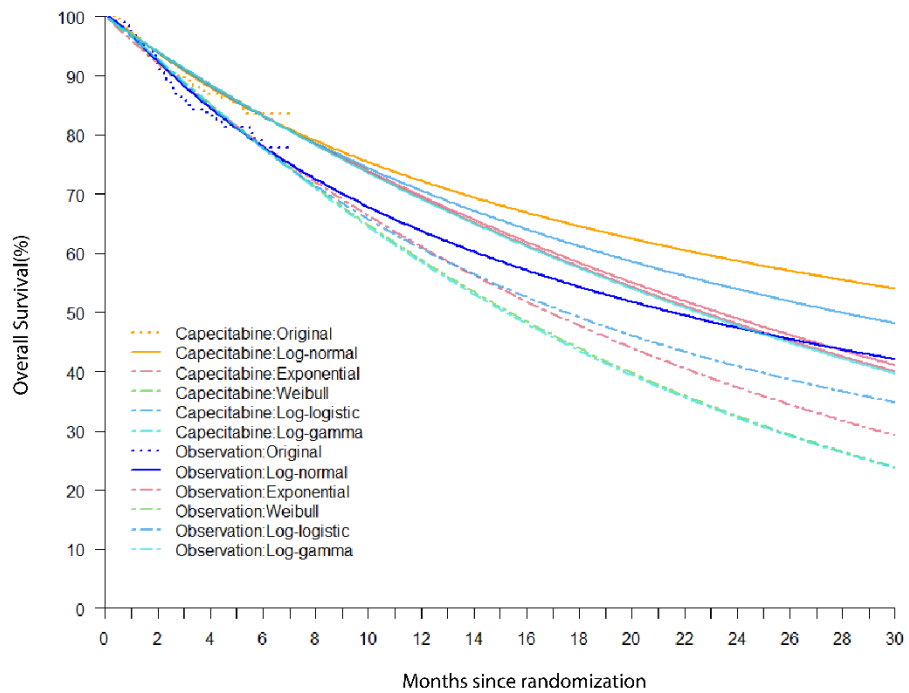

Figure S1. The fitted survival curves by five parametric distributions for the capecitabine maintenance and observational groups.

Table S4. Time-dependent transition probabilities matrix of two groups

| Cycle months                          | pFTF     | pFTR     | pFTD       | pRTR     | pRTD     |
|---------------------------------------|----------|----------|------------|----------|----------|
| <b>Capecitabine maintenance group</b> |          |          |            |          |          |
| 1                                     | 0.995075 | 0.00483  | 9.50E-05   | 0.880343 | 0.119657 |
| 2                                     | 0.994216 | 0.005689 | 9.50E-05   | 0.751205 | 0.248795 |
| 3                                     | 0.994363 | 0.005542 | 9.50E-05   | 0.660326 | 0.339674 |
| 4                                     | 0.994581 | 0.005324 | 9.50E-05   | 0.591029 | 0.408971 |
| 5                                     | 0.994797 | 0.005108 | 9.50E-05   | 0.534812 | 0.465188 |
| 6                                     | 0.994995 | 0.00491  | 9.50E-05   | 0.487484 | 0.512516 |
| 7                                     | 0.995176 | 0.004729 | 9.50E-05   | 0.446635 | 0.553365 |
| 8                                     | 0.99534  | 0.004565 | 9.50E-05   | 0.410735 | 0.589265 |
| 9                                     | 0.995489 | 0.004416 | 9.50E-05   | 0.378745 | 0.621255 |
| 10                                    | 0.995625 | 0.00428  | 9.50E-05   | 0.349927 | 0.650073 |
| 11                                    | 0.99575  | 0.004155 | 9.50E-05   | 0.323736 | 0.676264 |
| 12                                    | 0.995865 | 0.00404  | 9.50E-05   | 0.299756 | 0.700244 |
| .....                                 | .....    | .....    | .....      | .....    | .....    |
| 360                                   | 0.997784 | 0        | 0.00221598 | 0        | 1        |
| <b>Observational group</b>            |          |          |            |          |          |
| Cycle months                          | pFTF     | pFTR     | pFTD       | pRTR     | pRTD     |
| 1                                     | 0.994786 | 0.005119 | 9.50E-05   | 0.923519 | 0.076481 |
| 2                                     | 0.992458 | 0.007447 | 9.50E-05   | 0.831824 | 0.168176 |
| 3                                     | 0.992126 | 0.007779 | 9.50E-05   | 0.758097 | 0.241903 |
| 4                                     | 0.992146 | 0.007759 | 9.50E-05   | 0.699184 | 0.300816 |
| 5                                     | 0.992276 | 0.007629 | 9.50E-05   | 0.650101 | 0.349899 |
| 6                                     | 0.992445 | 0.00746  | 9.50E-05   | 0.608046 | 0.391954 |
| 7                                     | 0.992625 | 0.00728  | 9.50E-05   | 0.571288 | 0.428712 |
| 8                                     | 0.992805 | 0.0071   | 9.50E-05   | 0.538677 | 0.461323 |
| 9                                     | 0.99298  | 0.006925 | 9.50E-05   | 0.509407 | 0.490593 |
| 10                                    | 0.993148 | 0.006757 | 9.50E-05   | 0.482887 | 0.517113 |
| 11                                    | 0.993307 | 0.006598 | 9.50E-05   | 0.458672 | 0.541328 |
| 12                                    | 0.993459 | 0.006446 | 9.50E-05   | 0.436416 | 0.563584 |
| .....                                 | .....    | .....    | .....      | .....    | .....    |
| 360                                   | 0.997784 | 0        | 0.00221598 | 0        | 1        |

pFTF: Transition probability from disease-free state to disease-free state.

pFTR: Transition probability from disease-free state to relapse state.

pFTD: Transition probability from disease-free state to death state.

pRTR: Transition probability from relapse state to relapse state.

pRTD: Transition probability from relapse to death state.

Table S5. The cost-effectiveness of capecitabine maintenance therapy based on alternative survival functions

| Survival functions  | Effectiveness (QALYs) | Incremental Effectiveness | Cost (\$) | Incremental Cost | ICER (\$ per QALY) |
|---------------------|-----------------------|---------------------------|-----------|------------------|--------------------|
| <b>Exponential</b>  |                       |                           |           |                  |                    |
| Observation         | 6.92                  | —                         | 4176.94   | —                | —                  |
| Capecitabine        | 8.36                  | 1.44                      | 8327.07   | 4150.13          | 2876.78            |
| <b>Weibull</b>      |                       |                           |           |                  |                    |
| Observation         | 7.55                  | —                         | 5238.13   | —                | —                  |
| Capecitabine        | 9.12                  | 1.57                      | 8819.09   | 3580.96          | 2284.43            |
| <b>Log-logistic</b> |                       |                           |           |                  |                    |
| Observation         | 7.78                  | —                         | 5218.24   | —                | —                  |
| Capecitabine        | 9.19                  | 1.41                      | 8825.03   | 3606.79          | 2561.02            |
| <b>Gamma</b>        |                       |                           |           |                  |                    |
| Observation         | 7.43                  | —                         | 5375.73   | —                | —                  |
| Capecitabine        | 9.04                  | 1.61                      | 8879.83   | 3504.10          | 2176.91            |

—: Not applicable.

ICER: Incremental cost-effectiveness ratio; QALY: Quality-adjusted life year.
